# Supplementary material for: Yeast Biological Networks Unfold the Interplay of Antioxidants, Genome and Phenotype, and Reveal a Novel Regulator of the Oxidative Stress Response
Source: PLOS journal article supplement (doi:10.1371/journal.pone.0013606), 2010-10-25
Supplement: S6 (10.1371/journal.pone.0013606.s006) [file journal.pone.0013606.s006]

| Yeast gene coding<br>for a member of<br>FMP43 complex | Human gene (orthologue) | Protein Description/UniProt Entry                        |
|-------------------------------------------------------|-------------------------|----------------------------------------------------------|
| <i>YER067W</i>                                        | No                      | NA                                                       |
| <i>TMA10</i>                                          | No                      | NA                                                       |
| <i>YJL200C</i>                                        | <i>ACO2</i>             | Aconitase (Q71UF1)                                       |
| <i>NOP13</i>                                          | No                      | NA                                                       |
| <i>YJL103C</i>                                        | No                      | NA                                                       |
| <i>YMR206W</i>                                        | No                      | NA                                                       |
| <i>YMR090W</i>                                        | No                      | NA                                                       |
| <i>SPG4</i>                                           | No                      | NA                                                       |
| <i>YFR017C</i>                                        | No                      | NA                                                       |
| <i>FMP16</i>                                          | No                      | NA                                                       |
| <i>YGL157W</i>                                        | No                      | NA                                                       |
| <i>RBG2</i>                                           | <i>DRG2</i>             | Developmentally-regulated GTP-binding protein 2 (P55039) |
| <i>SPG1</i>                                           | No                      | NA                                                       |
| <i>YGR067C</i>                                        | No                      | NA                                                       |
| <i>YKL187C</i>                                        | No                      | NA                                                       |

| Proteins participating in the FMP43-related complex | SGD Description                                                                                                                                                                                                                               |
|-----------------------------------------------------|-----------------------------------------------------------------------------------------------------------------------------------------------------------------------------------------------------------------------------------------------|
| YER067W (RGI1)                                      | Putative protein of unknown function; green fluorescent protein (GFP)-fusion protein localizes to the cytoplasm and nucleus; YER067W is not an essential gene; protein abundance is increased upon intracellular iron depletion               |
| TMA10                                               | Protein of unknown function that associates with ribosomes                                                                                                                                                                                    |
| YJL200C (ACO2)                                      | Putative mitochondrial aconitase isozyme; similarity to Aco1p, an aconitase required for the TCA cycle; expression induced during growth on glucose, by amino acid starvation via Gcn4p, and repressed on ethanol                             |
| NOP13                                               | Nucleolar protein found in preribosomal complexes; contains an RNA recognition motif (RRM)                                                                                                                                                    |
| YJL103C (GSM1)                                      | Putative zinc cluster protein of unknown function; proposed to be involved in the regulation of energy metabolism, based on patterns of expression and sequence analysis                                                                      |
| YMR206W                                             | Putative protein of unknown function; YMR206W is not an essential gene                                                                                                                                                                        |
| YMR090W                                             | Putative protein of unknown function with similarity to DTDG-glucose 4,6-dehydratases; GFP-fusion protein localizes to the cytoplasm; up-regulated in response to the fungicide mancozeb; not essential for viability                         |
| SPG4                                                | Protein required for survival at high temperature during stationary phase; not required for growth on nonfermentable carbon sources                                                                                                           |
| YFR017C                                             | Putative protein of unknown function; green fluorescent protein (GFP)-fusion protein localizes to the cytoplasm and is induced in response to the DNA-damaging agent MMS; YFR017C is not an essential gene                                    |
| FMP16                                               | Putative protein of unknown function; proposed to be involved in responding to conditions of stress; the authentic, non-tagged protein is detected in highly purified mitochondria in high-throughput studies                                 |
| YGL157W                                             | Oxidoreductase, catalyzes NADPH-dependent reduction of the bicyclic diketone bicyclo[2.2.2]octane-2,6-dione (BCO2,6D) to the chiral ketoalcohol (1R,4S,6S)-6-hydroxybicyclo[2.2.2]octane-2-one (BCO2one6ol)                                   |
| RBG2 (GIR1)                                         | Protein with similarity to mammalian developmentally regulated GTP-binding protein                                                                                                                                                            |
| SPG1                                                | Protein required for survival at high temperature during stationary phase; not required for growth on nonfermentable carbon sources; the authentic, non-tagged protein is detected in highly purified mitochondria in high-throughput studies |
| YGR067C                                             | Putative protein of unknown function; contains a zinc finger motif similar to that of Adr1p                                                                                                                                                   |
| YKL187C                                             | Putative protein of unknown function; the authentic, non-tagged protein is detected in a phosphorylated state in highly purified mitochondria in high-throughput studies                                                                      |
